# Supplementary material for: Specific Microbial Communities Associate with the Rhizosphere of Welwitschia mirabilis, a Living Fossil
Source: PubMed Central journal article supplement (PMC4827806; doi:10.1371/journal.pone.0153353), 2016-04-11

S2 Figure

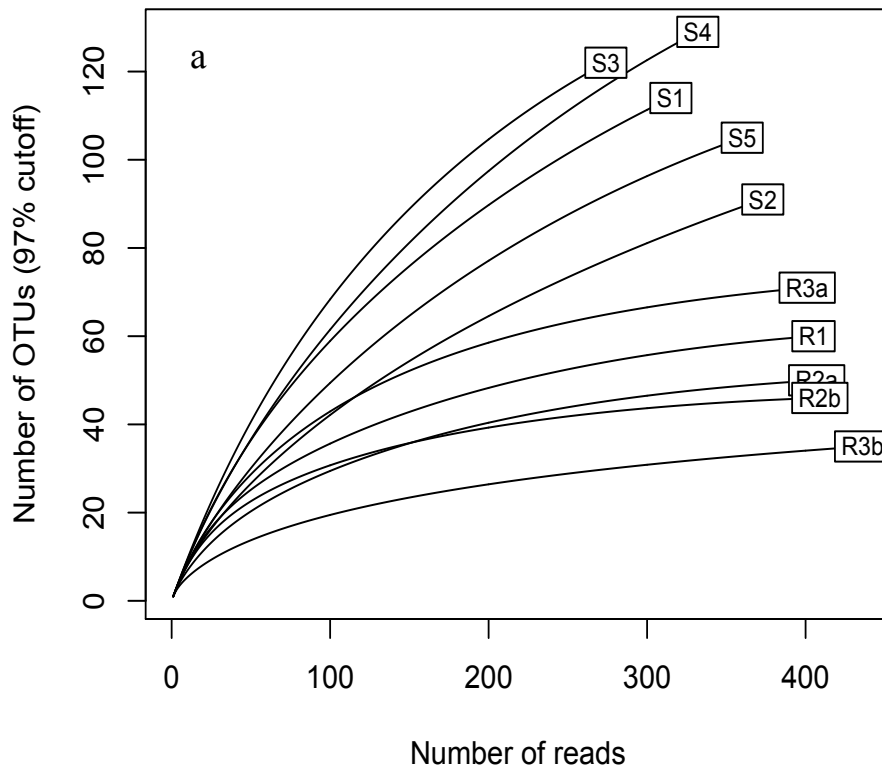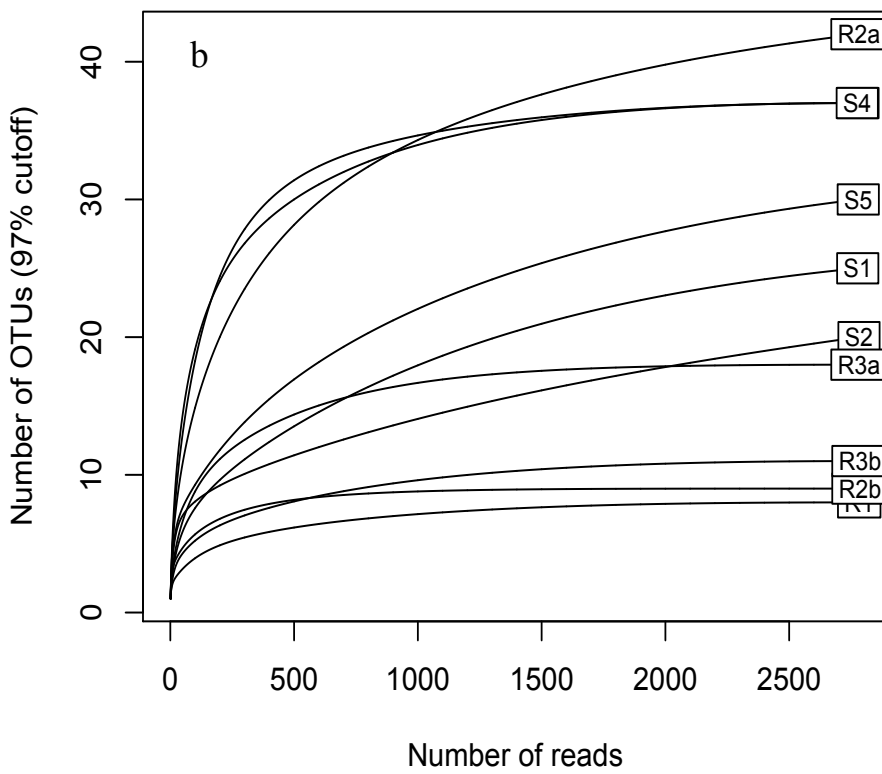

Supplement: pone.0153353.s002.pdf [file pone.0153353.s002.pdf]
