# Supplementary material for: Specific Microbial Communities Associate with the Rhizosphere of Welwitschia mirabilis, a Living Fossil
Source: PubMed Central journal article supplement (PMC4827806; doi:10.1371/journal.pone.0153353), 2016-04-11

**S3 Figure**

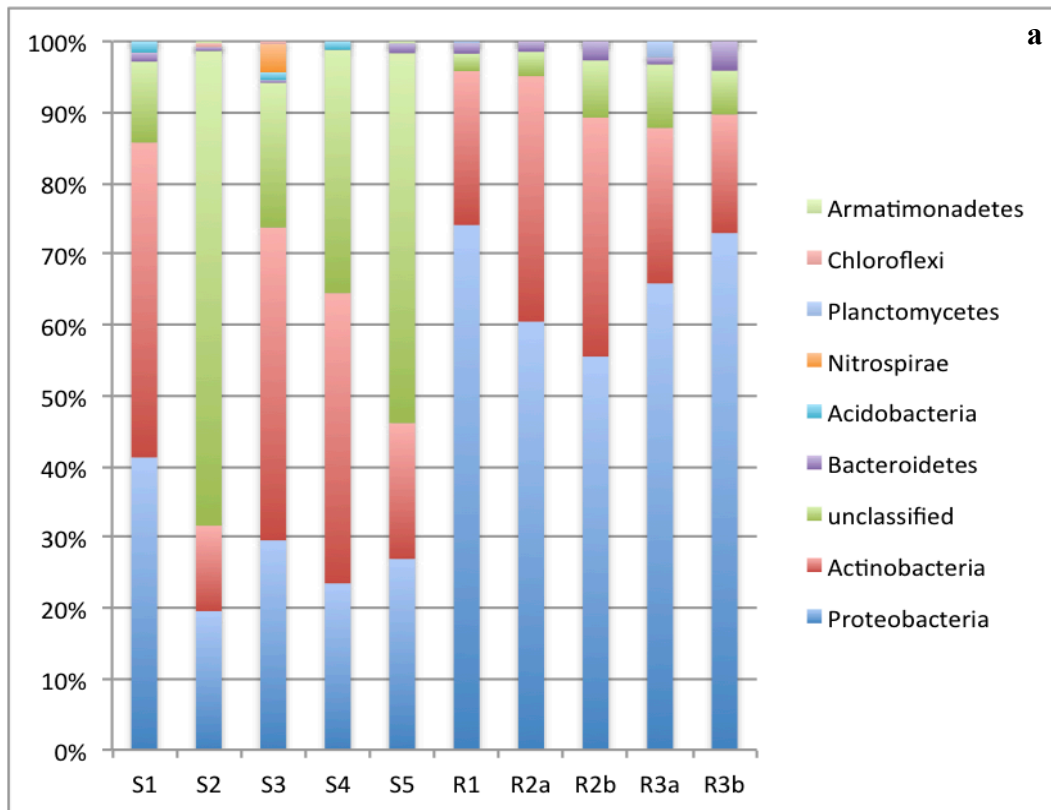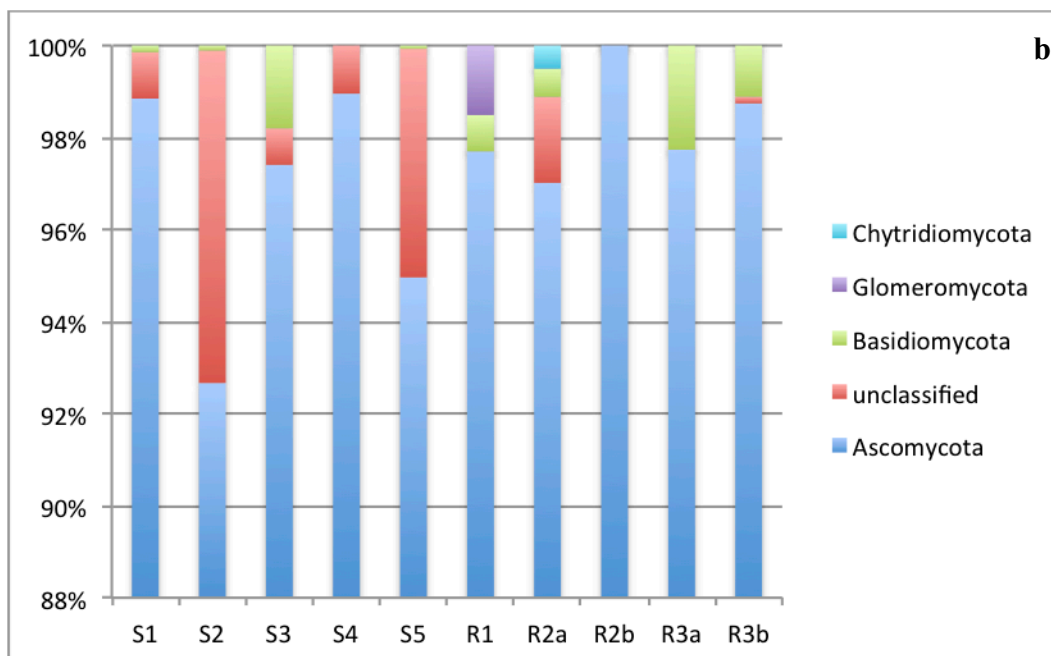

Supplement: pone.0153353.s003.pdf [file pone.0153353.s003.pdf]
